# Supplementary material
Source: Royal Society of Chemistry journal article supplement (doi:10.1039/d6ay00775a)

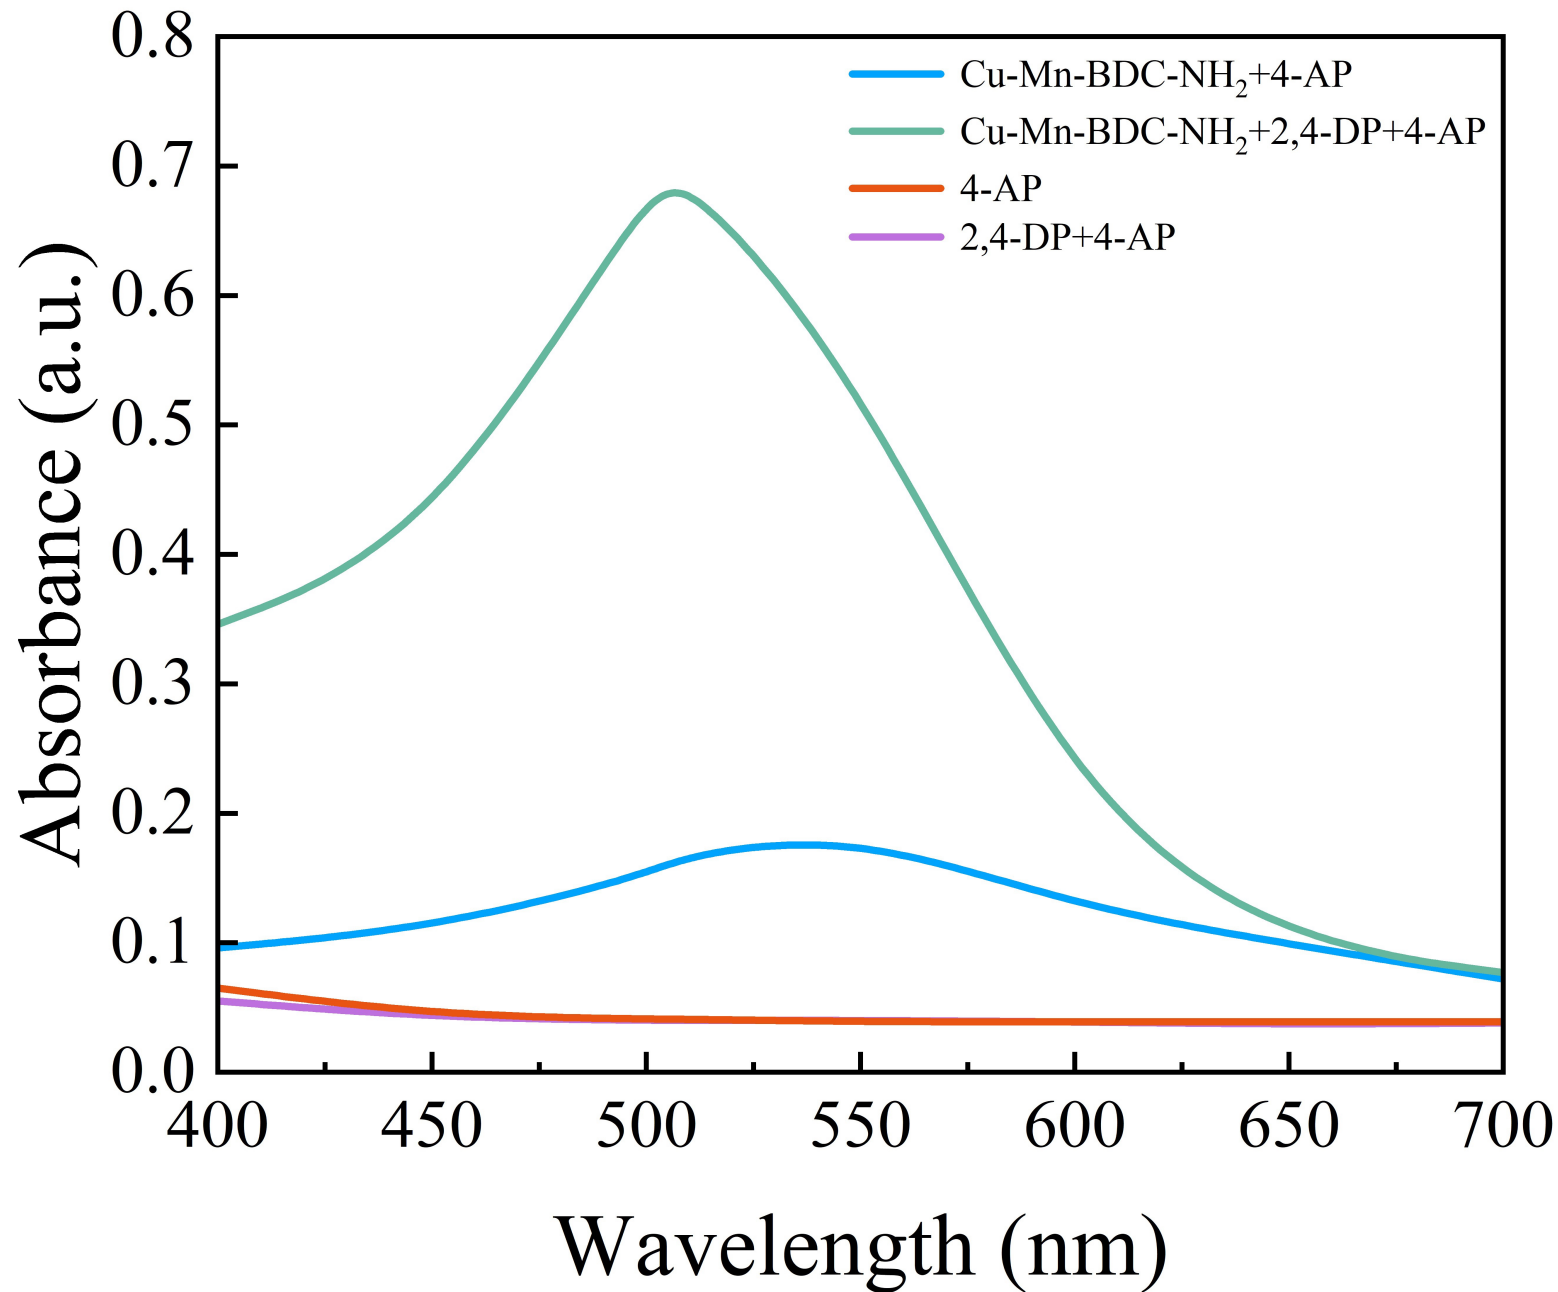

Supplement: d6ay00775a3.pdf [file d6ay00775a3.pdf]

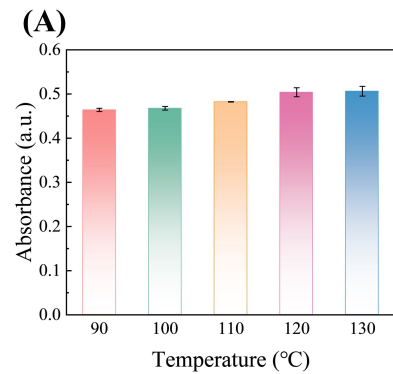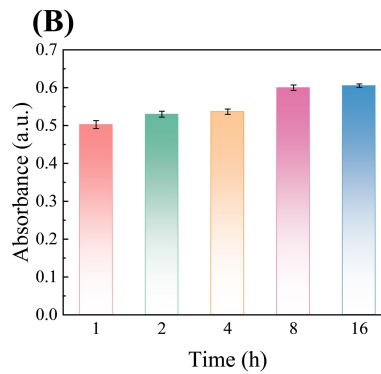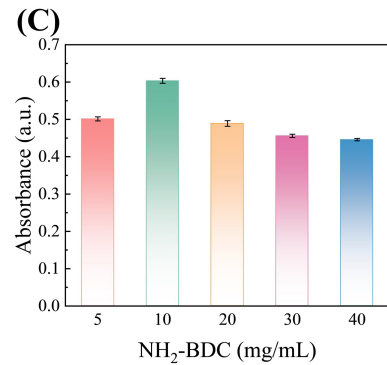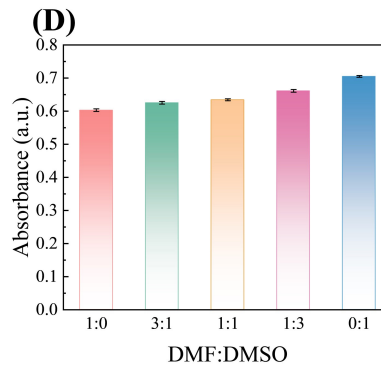

Supplement: d6ay00775a4.pdf [file d6ay00775a4.pdf]

(A)

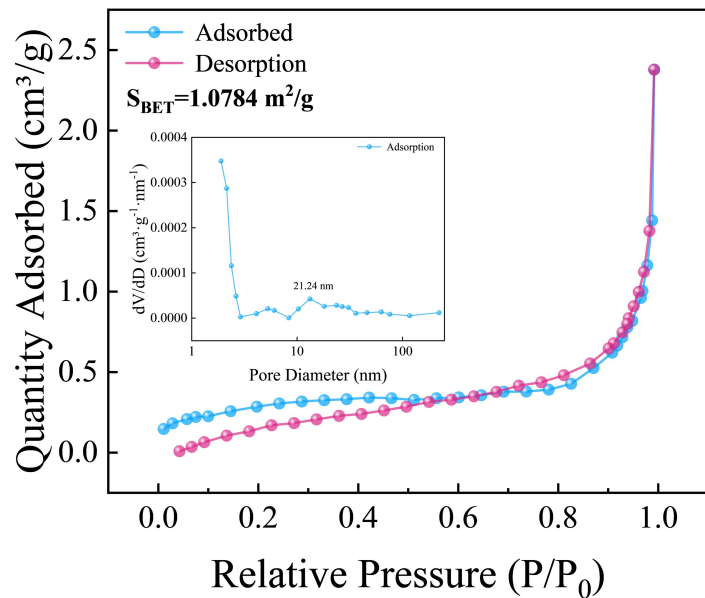

(B)

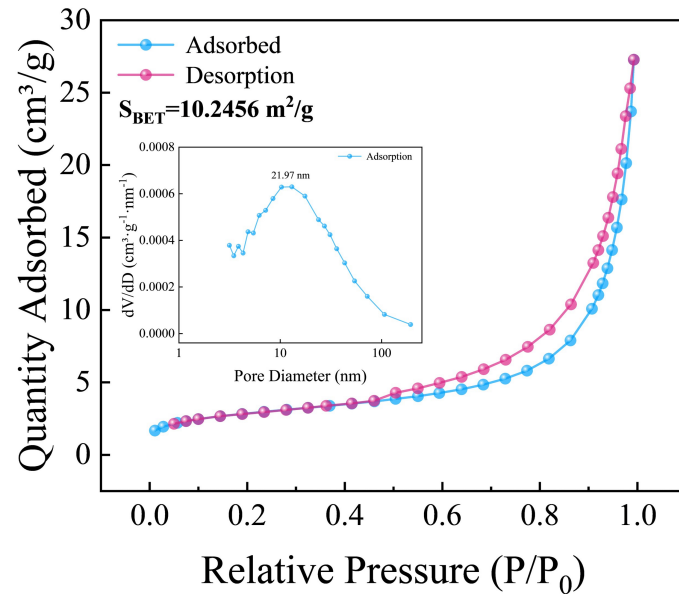

Supplement: d6ay00775a5.pdf [file d6ay00775a5.pdf]

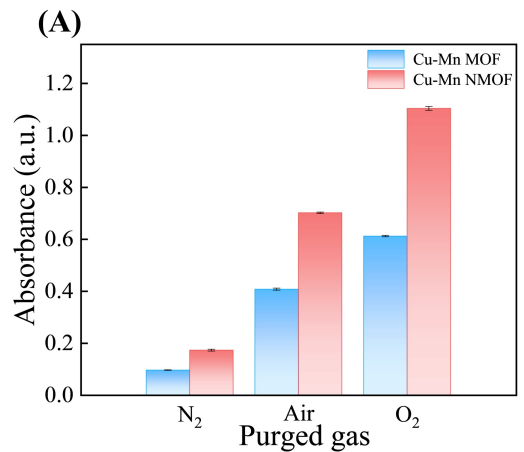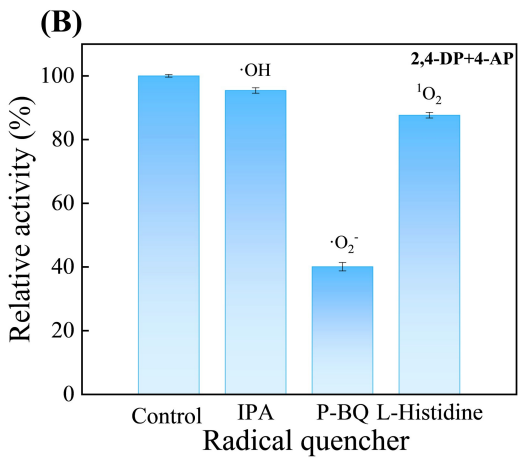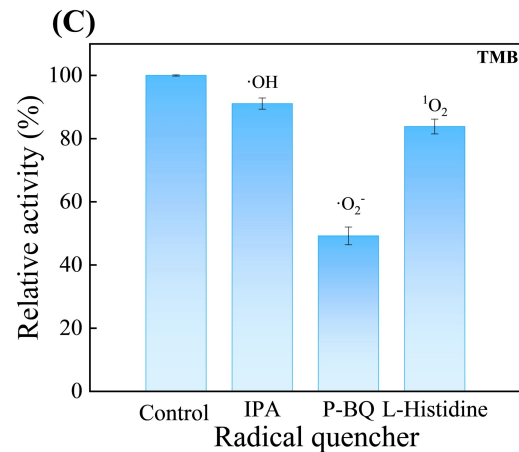

Supplement: d6ay00775a6.pdf [file d6ay00775a6.pdf]

(A)

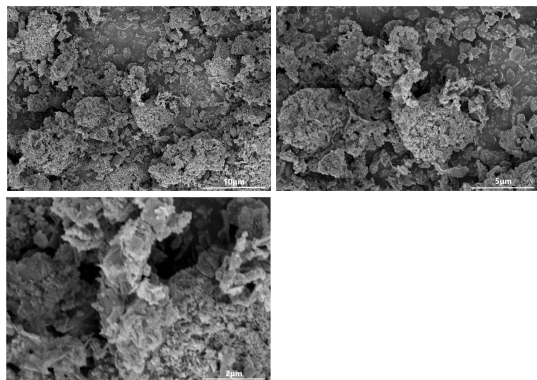

(B)

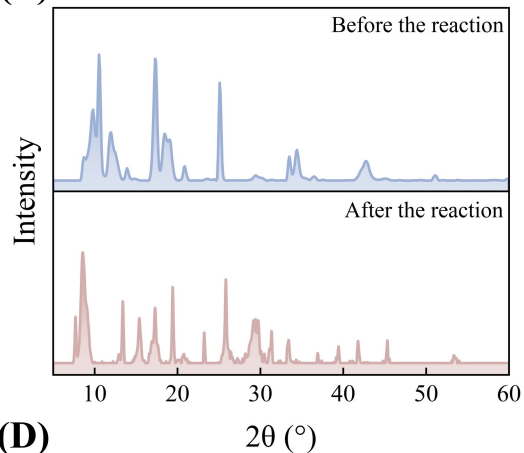

(C)

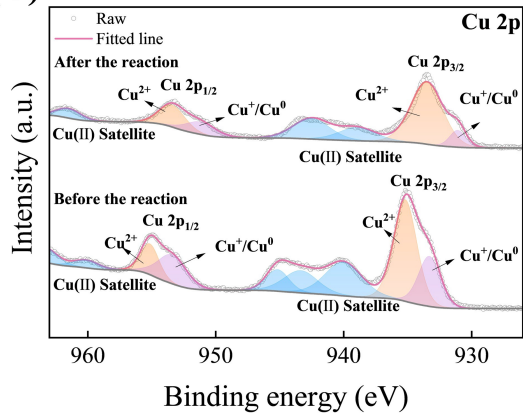

(D)

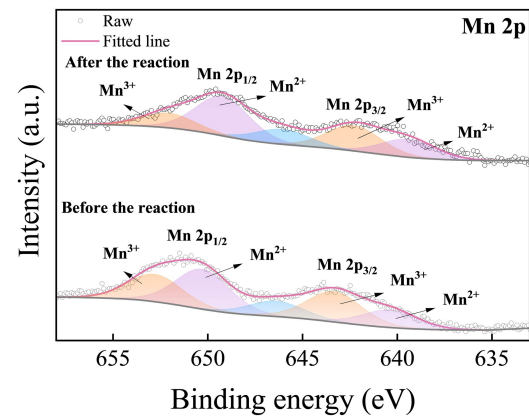

Supplement: d6ay00775a7.pdf [file d6ay00775a7.pdf]

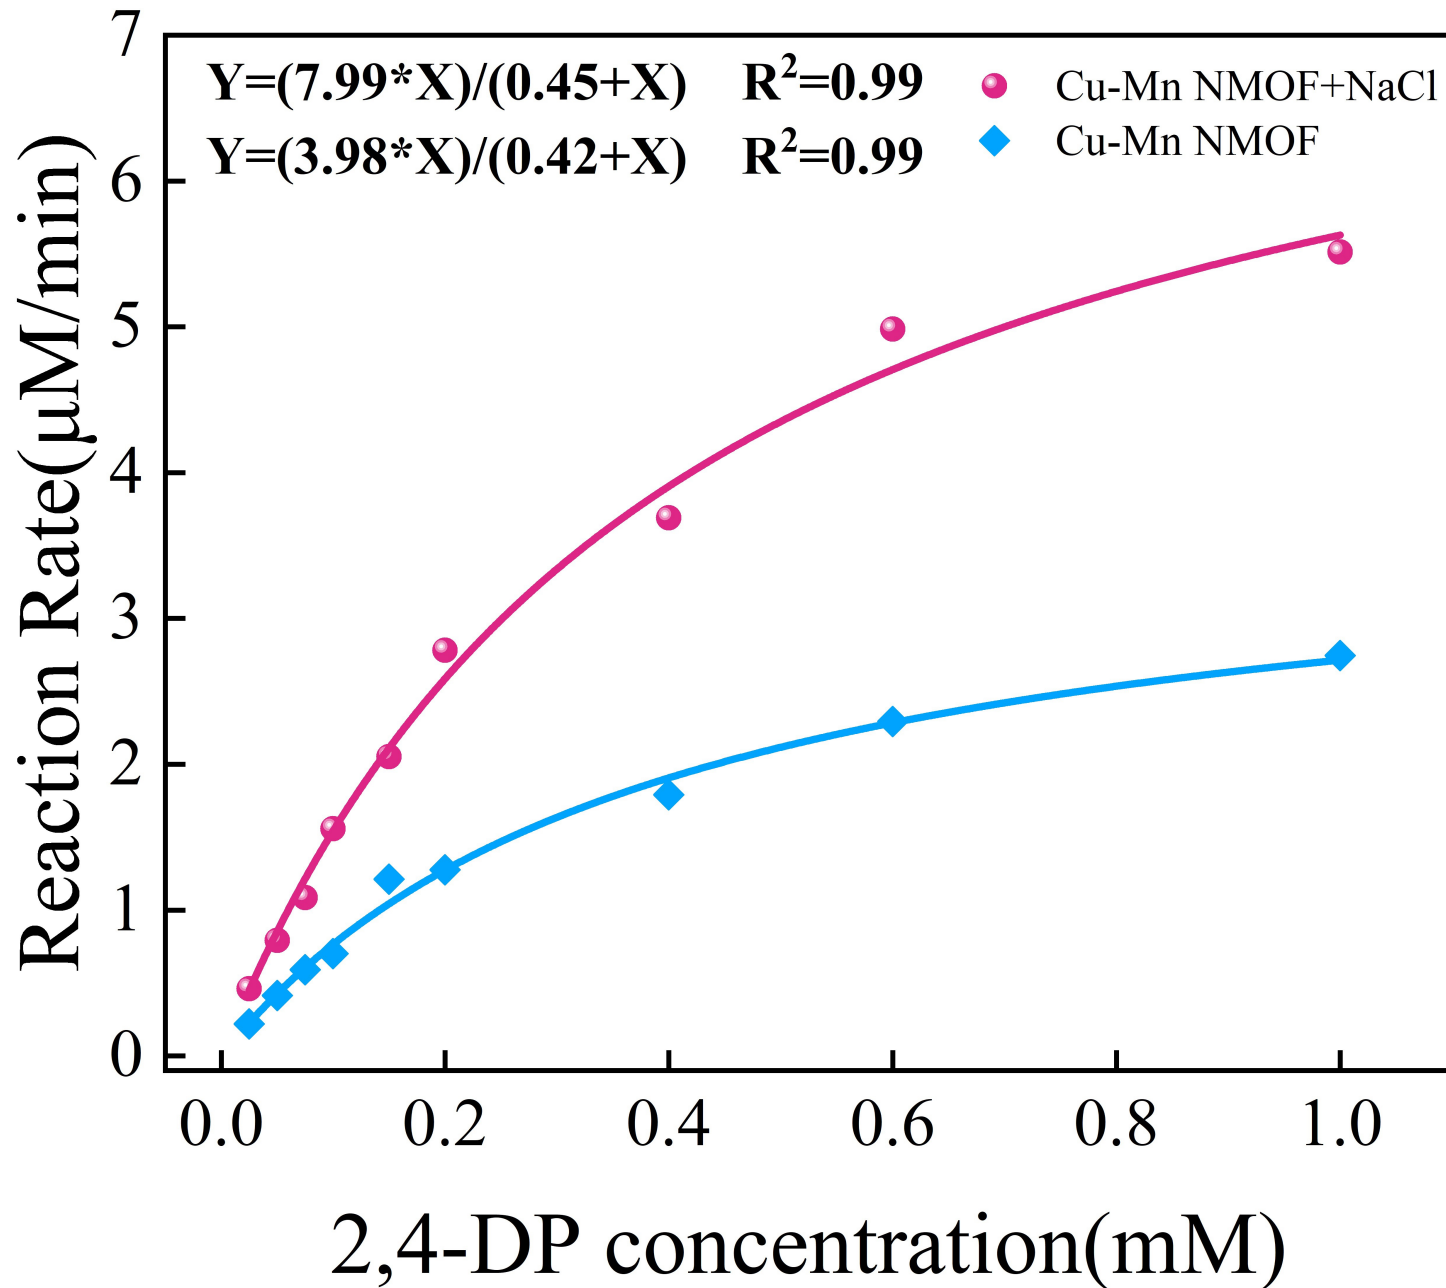

Supplement: d6ay00775a8.pdf [file d6ay00775a8.pdf]
